# Supplementary material for: Effects of Brief Mindfulness-Based Interventions on Health-Related Outcomes: a Systematic Review
Source: Springer Nature journal article supplement (doi:10.1007/s12671-019-01163-1), 2019-05-31
Supplement: MOESM1 [file 16762400]

Electronic Supplementary Material 1. Summary Table

Table 1 Summary of characteristics of included studies

| First author  [Reference] a | Design/Aimb | Participants | Interventions | Measuresc | Significant intervention effects |
| --- | --- | --- | --- | --- | --- |
| Ainsworth,  2015[26]  UK | RCT  Aim/s: to compare the effects of two mindfulness meditations with general relaxation on autonomic and neuropsychological outcomes | 32 meditation naïve adults  Mean age 21.7yrs±3.2yrs  69% female | (i) 10min audio focused attention (FA) mindfulness meditation  (ii) 10min audio open-monitoring (OM) mindfulness meditation  (iii) 10min audio relaxation (“sit and relax”)  In order to increase anxiety and autonomic arousal, all participants inhaled 7.5% carbon dioxiode (CO2) for 20min immediately following the interventions. | STAI, Attention Control Scale, Mindful Attention Awareness Scale, HR, diastolic and systolic blood pressure, VAS anxiety ratings, PANAS and emotional version of the anti-saccade eye-movement task with pictures from the International Affective Picture Set | Following the CO2 challenge, there was significantly less increase in subjective anxiety in OM vs ‘relax’ group.  FA had a modest effect. |
| Ainsworth,  2017[27]  UK | RCT  Aim/s: to examine the effects of two brief interventions on anxiety and the frequency of worrying thoughts | 77 university students  Mean 20.8yrs ±3.2yrs  73% female | (i) 10min audio mindfulness acceptance meditation  (ii) 10min audio focused attention meditation  (iii) 10min audio progressive muscle relaxation (PMR)  Following the interventions, participants went through a worry induction task. | STAI, Attention  Control Scale, Philadelphia Mindfulness Scale, Penn-State Worry Questionnaire,  VAS anxiety ratings | The acceptance group had significantly less worry than both the attention and PMR group, and the attention group had less worry than the PMR group.  There was no increase of worry frequency in the acceptance group but a significant increase in the attention and PMR group. |
| Alberts, 2013[28]  Netherlands | RCT  Aim/s: to investigate the short-term effects of an acceptance-based intervention on food cravings | 65 university students  Mean age 21.4yrs±2.7yrs  80% female | (i) 5min audio with acceptance instructions  (ii) 5min audio with suppression instructions  (iii) control with no instructions (were allowed to eat food)  Following the interventions participants were presented with a task that evoked food cravings. | General Food Craving Questionnaire-State, Restraint Scale, VAS hunger rating | The control group had significantly lower craving levels than both the suppression and acceptance group.  Within group trend analysis found that over the course of the experiment, the acceptance group had craving levels that significantly increased, the suppression group remained stable and the control declined. |
| Arch, 2006[29]  USA | RCT  Aim/s: to investigate whether a brief mindfulness intervention can support emotional regulation in response to aversive experimental stimuli | 60 primarily university students  60% were 18-19yrs  69% female | Three interventions preceded exposure to picture slides from the International Affective Picture System:  (i) 15min audio with focused breathing instructions  (ii) 15min audio with “worry” instructions, covering six domains of worry  (iii) 15min audio with unfocused attention instructions repeated every 30-60s | Hospital Anxiety and Depression Scale, Brief Marlow-Crowne Social Desirability Scale, Affect Scale rating of emotional state, short PANAS, number of aversive picture slides willing to view, HR | Across the stimulus types, overall emotional reactivity as measured by the PANAS was significantly more stable and the least volatile for the focused breathing group compared with the worry and unfocused attention group.  The focused breathing group expressed greater willingness to view the negative slides, compared with the other groups. |
| Atkinson, 2012[30]  Australia | RCT  Aim/s: to investigate engagement and effects of an acceptance intervention on body dissatisfaction (BD) and negative affect (NA) | 80 female university students  Mean age 23.6yrs±9.0yrs | (i) 10min educational video on acceptance as a coping technique, 3min guided acceptance exercise, and instructions  for using the technique including cue cards with reminders throughout the experiment  (ii) control with no instructions  Following the interventions, participants went through a BD induction. | Body satisfaction ratings on VAS, negative rating items from PANAS, Body Dissatisfaction subscale of the Eating Disorders Inventory, Difficulties in Emotion Regulation Scale, Ways of Coping Questionnaire-Revised, Five Facet Mindfulness Questionnaire | Acceptance training significantly increased weight and appearance satisfaction and reduced NA compared with the control. |
| Azam, 2015[31]  Canada | Stratified RCT  Aim/s: to investigate HR variability (HRV) in relation to maladaptive perfectionism and a brief mindfulness meditation | 60 university students classified as  maladaptive perfectionists Mean age 21.3yrs±1.2yrs  48% female | (i) 10min mindfulness breathing audio  (ii) 10min rest condition with audio-description of mindfulness meditation  Prior to intervention delivery, participants received a stress-induction computer-based pattern recognition task. | Perfectionism Cognitions Inventory, Electrocardiogram recordings for HRV | HRV was significantly elevated in the control group but not the perfectionist group. |
| Banks,  2015[32]  USA | RCT  Aim/s: to examine the impact of an at home mindfulness meditation training intervention on working memory and mind wandering | 62 meditation naïve university students  Mean age 20.9yrs±6.1yrs  63% female | (i) 15min audio of open monitoring mindfulness meditation training (MMT),  (ii) 15min audio of relaxation training (RT), including progressive muscle relaxation and body scan exercises  Following the one week intervention, participants underwent a writing stressor task | Automated Operation Span Task including thought probes to measure task-unrelated thoughts, Dundee Stress State Questionnaire, Five-Facet Mindfulness Questionnaire, PANAS, Acceptance and Action Questionnaire, Cognitive mechanism words using Linguistic Inquiry and Word Count Program, VAS for anxiety | Following the stressor task, working memory scores were significantly higher for in the MMT group compared with the RT group. |
| Baquedano,  2017[33]  Chile | RCT  Aim/s: to examine the effects of mindfulness attention compared with self-immersion in reducing salivation and automatic food bias | 50 healthy adults, some meditation naïve, some meditators  Mean age 28.7yrs±7.0yrs  66% female | (i) mindfulness instructions  (ii) self-immersion instructions  Following the interventions participants were given a task where they were exposed to neutral and attractive food pictures. | Saliva sampling and alpha-amylase activity measurement, Food-Craving Trait questionnaire, De-reification-as-a-Trait questionnaire, Five-Facet Mindfulness, Cognitive Fusion Questionnaire, reaction times during task | The mindfulness group demonstrated a significant reduction in automatic approach bias toward attractive food when compared with the immersion group. |
| Barnhofer, 2010[34]  UK | RCT  Aim/s: to investigate effects of two forms of meditation on EEG prefrontal a-asymmetry, an indicator thought to predict individual tendencies towards approach versus avoidance and related affective states | 15 adults with previous episode of major depression and in recovery for >8wks  Mean age 28.0±9.0yrs  80% female | (i) 15min audio mindfulness breathing meditation  (ii) 15min audio mindfulness metta (loving kindness) meditation | Beck Depression Inventory-II, Ruminative Responses Scale, EEG recording and quantification | The two types of meditation showed similar increases in left prefrontal activation, signaling stronger approach tendencies and positive affect. |
| Bonamo,  2015[35]  US | RCT  Aim/s: to determine if mindfulness may be helpful in enhancing the encoding of novel semantic information | 136 female university students  Mean age 19.5±2.4yrs | (i) 20min audio mindfulness body scan  (ii) 45min audio mindfulness body scan  (iii) no treatment control group  Following the interventions, participants completed an encoding task involving recall of English translations of Swahili words. | The Toronto Mindfulness Scale, STAI, The Center for Epidemiologic Studies Depression Scale, The Adult ADHD Self-Report Scale, Five Facet Mindfulness Scale | Participants in both the 20min or 45min body scan meditation condition recalled significantly more words than the control group.  State mindfulness levels were significantly higher after the meditation for the 20min group, but not for the 45min, compared with the control group. |
| Bowen, 2009[36]  USA | RCT  Aim/s: to examine the effects of a brief mindfulness intervention on smoking urges and behaviors | 123 university student smokers  Mean age 20.3yrs±3.3yrs  27% female | (i) 11min audio with mindfulness coping instructions and techniques of “urge-surfing”  (ii) 11min audio with instructions to use existing coping techniques for smoking urges  Following the interventions, smokers participated in a cue exposure paradigm designed to elicit smoking urges. | Smoking and Quitting History questionnaire, Fagerström Test for Nicotine Dependence, PANAS, short form Questionnaire of Smoking Urges, smoking quantity and frequency | Smoking rates over the 7-day follow-up period were significantly less in the mindfulness group than the control. |
| Broderick, 2005[37]  USA | RCT  Aim/s: to examine whether a brief mindfulness intervention can reduce dysphoric mood | 177 university students  Mean age 20.9yrs  79% female | (i) 8min audio mindfulness breathing meditation  (ii) 8min reading and practicing distraction instructions  (iii) 8min of reading and practicing rumination instructions  Interventions were given following a dysphoric mood induction. | PANAS | Post-intervention, the mindfulness group reported having significantly lower dysphoric mood than the distraction and rumination group. |
| Brunyé, 2013[38]  USA | Within-subjects crossover design  Aim/s: to examine effects of mindfulness exercises and L-theanine | 36 university students with low vs high maths anxiety scores  Mean age 20.8yrs±2.6 50% female | 0 or 200mg of L-theanine, crossed with either:  (i) 15min “focused breathing exercise”  (ii) 15 min “unfocused breathing exercise”  (iii) 15min “worry exercise” | 30-item Mathematics Anxiety Rating Scale,  Mindful Attention Awareness Scale, Five Facet Mindfulness Questionnaire, Operation Span, Brief Mood Introspection Scale, timed mental arithmetic task | Effect of high math anxiety participants underperforming, compared with low math anxiety participants, was significantly alleviated by a focused breathing exercise and increased ratings of calmness |
| Campbell-Sills, 2006[39]  USA | RCT  Aim/s: to investigate the physiological and subjective effects of emotional suppression and acceptance among individuals with anxiety and mood disorders | 60 patients with mood or anxiety disorders  Mean age 35.3yrs±11.7yrs  50% female | (i) 5min audio with acceptance instructions for emotions  (ii) 5min audio with suppression instructions for emotions  Following the interventions participants watched an emotion-provoking film. | PANAS, HR, respiratory sinus arrhythmia, skin conductance level, Anxiety Disorders Interview Schedule for DSM-IV (Diagnostic and Statistical Manual of Mental Disorders, 4th Edition) | Following the film, the acceptance group had significantly lower subjective distress ratings than the suppression group.  HR increased significantly during the experiment in the suppression group and decreased significantly in the acceptance group. |
| Creswell,  2014[40]  USA | RCT  Aim/s: to test the effects of brief mindfulness training on stress reactivity to the Trier Social Stress Test and whether dispositional mindfulness interacts with these effects | 66 university students  Mean age 21.7yrs±2.9yrs  41% female | (i) 25min mindfulness training audio  (ii) 25min analytic cognitive control training audio  Following delivery of interventions, participants were exposed to a standardized laboratory social-evaluative stress challenge task. | Beliefs, efficacy and relevancy questionnaire, Mindful Attention Awareness Scale, stress perception ratings, salivary cortisol, systolic and diastolic blood pressure | Mindfulness training significantly reduced perceived stress more than analytic cognitive training  Cortisol response to the stress challenge task was significantly higher with mindfulness training than with analytic cognitive training |
| Cropley, 2007[41]  UK | RCT  Aim/s: to examine acute effects of a body scan on desire to smoke and tobacco withdrawal symptoms | 30 smokers (≥10cigarettes/  day for >3yrs)  Mean age 25.5±2.9yrs  40% female | (i) 10min audio mindfulness body scan  (ii) 10min audio reading of a natural history passage | Fagerström Test for Nicotine Dependence, Mood and Physical Symptoms Scale | Compared with the control group, the body scan group had a significant reduction in desire to smoke up to 5min after the intervention. |
| Diaz, 2014[42]  Spain | RCT  Aim/s: to investigate if mindfulness helps people cope with recollection of acute stressors | 76 female university students  Mean age 23.1±3.7yrs | (i) instruction to think or talk about an acutely stressful experience for 10min using mindfulness observations and non-judgement  (ii) instruction to think or talk about an acutely stressful experience for 10min by evaluating the situation and analysing potential future consequences  (iii) instruction to think in silence about an acutely stressful experience  Interventions were delivered following an acute stressor recollection task. | Five-Facet Mindfulness Questionnaire, abridged version of the Health Survey (SF-36),  PANAS, intrusive thought frequency with subscale of Impact of Event Scale | The mindfulness group had significantly higher positive affect and significantly lower negative affect than the control group immediately after the stress induction. |
| Dixon-Gordon, 2017[43]  US & Canada | RCT  Aim/s: to examine the effects of instructed  suppression versus acceptance on emotional, psychophysiological,  and behavioral outcomes among individuals with BPD, with MDD, and non-psychiatric participants. | 216 participants with either major depressive disorder  (MDD), borderline personality disorder (BPD) or no psychiatric disorders  Mean age 32.3yrs±11.1yrs  82% female | (i) 10min audio of emotion acceptance instructions  (ii) 10min audio of emotion suppression instructions  Following the interventions participants were exposed to emotion induction procedures and cognitive tasks to measure distress tolerance. | HRV, PANAS, Acceptance and Action Questionnaire, Dissociation-Tension Scale, skin conductance level, nonspecific skin conductance responses | Those with BPD in the acceptance group demonstrated an increased HRV compared with those in the suppression group. |
| Eisenbeck,  2018[44]  Spain | RCT  Aim/s: to examine the effects of a single mindfulness session on attention and memory tasks | 46 meditation naïve university students  Mean age 25.2yrs±8.0yrs  59% female | (i) 15min audio mindfulness focused breathing exercise (FB)  (ii) 15min audio book reading of The Hobbit (control)  Prior to and after the interventions, participants completed attention and memory tasks. | Concentrated Attention task of the Toulouse-Pierron Factorial Battery, Logical Memory Subtest I from the Wechsler Memory Scale III), PANAS, Kentucky Inventory of Mindfulness Skills | The mindfulness group had significantly enhanced memory task performance in comparison with the control group. |
| Erisman, 2010[45]  USA | RCT  Aim/s: to investigate the effects of mindfulness on emotional experiences and regulation | 30 adults  Mean age 24.1±7.3yrs  50% female | (i) 10min audio with mindfulness induction and exercise  (ii) 10min audio with educational excerpts from a public radio station and a word search puzzle to complete  Both prior to and following the delivery of interventions, participants watched 3 film clips designed to evoke negative, positive and mixed emotion. | Difficulties in Emotion Regulation Scale, Mindfulness Attention Awareness Scale, PANAS, State Difficulties in Emotion Regulation Scale, Toronto Mindfulness Scale, HR, skin conductance | The mindfulness group had significantly higher positive affect in response to the positive film clip compared with the control group.  Participants in the mindfulness condition reported significantly less negative affect immediately after the post-intervention affectively mixed clip. |
| Feldman, 2010[46]  US | RCT  Aim/s: to compare the immediate effects  of mindful breathing to progressive muscle relaxation (PMR) and loving kindness meditation | 190 female, novice meditators, university students  Mean age 19.8±1.3yrs | (i) 15min audio mindfulness breathing (MB)  (ii) 15min audio progressive muscle  relaxation (PMR)  (iii) 15 min audio loving kindness meditation (LKM) | Repetitive thought (RT) study specific measure, decentering subscale of Toronto Mindfulness Scale, negative affect subscale of PANAS | With reference to their experiences while meditating, MB reported significantly higher frequency of RT and greater decentering, than PMR and LKM  MB had greater frequency of RT but no difference in negative reaction to RT relative to participants in the PMR and LKM conditions. |
| Fisher, 2016[47]  UK | RCT  Aim/s: to examine effects of mindfulness attention on eating behaviors in a laboratory experiment | 40 female university staff and research participant panel members  Mean age 30.0yrs±7.7yrs | (i) 10min mindfulness introduction and 10min breathing practice as instructed by experimenter  (ii) 10min reading from book exploring rainforests and 10min sitting (control)  Participants practiced the interventions during a palatable food cue exposure. | Five-Facet Mindfulness Questionnaire, Three Factor Eating Questionnaire, BMI, VAS hunger rating, state mindfulness, liking or desire for food, current mood, Food Cravings Questionnaire, number of cookies eaten | There was no significance difference between groups for hunger or food cravings but compared with the control group the mindfulness group ate significantly fewer cookies and reported feeling significantly ‘fuller.’ |
| Gamboa,  2017[48] | RCT  Aim/s: to assess the effects of brief mindfulness strategy on direct forgetting of emotional auditory material | 38 meditation naïve adults  Mean age 26.5yrs±5.5yrs  61% female | (i) mindfulness based breathing instructions and 10 min exercise using these instructions  (ii) instructions to create and use own strategies  Following the interventions participants were given recall and recognition tasks. | Mean percentage of words recalled, mean percentage of words correctly recognized, reaction times of words correctly recognized, digit span test for baseline measure | The mindfulness group did not show improved forgetting of emotional material compared with the control group but did demonstrate an enhanced recognition of neutral material. |
| Garland,  2017[49]  US | RCT  Aim/s: to examine the effects of brief mindfulness training on the management of acute pain in hospitalized patients | 244 in-patients with acute pain  Mean age 51.1yrs±16.6yrs  57% female | (i) 15min training session in mindfulness attention and breathing training  (ii) 15min training in hypnotic suggestion  (iii) 15min psychoeducation session on coping with pain | VAS for pain intensity and unpleasantness, relaxation, anxiety, pleasant body sensations, and desire for opioids | Mindfulness and hypnotic suggestion training groups had significantly better pain levels (i.e, intensity and unpleasantness), relaxation levels and pleasurable body sensations than the psychoeducation group.  Those in the hypnotic suggestion group reported significantly less desire for opioids in comparison with the psychoeducation group.  All three intervention groups had significantly  reduced anxiety. |
| Garland, 2015[50]  US | RCT  Aim/s: to examine the effects of brief mindfulness training on cognitive reappraisal | 44 university students  Mean age 24.4±4.0yrs  82% female | (i) 13min audio of mindfulness training induction  (ii) 13min audio of suppression induction  (iii) 13min audio of mind wandering induction  Participants listened to the audio in the lab at session 1 and 7 days later during session 2. They were also requested to use the audio at least two times on their own between the two lab sessions. | Toronto Mindfulness Scale, Five Facet Mindfulness Questionnaire, Emotion Regulation Questionnaire | The mindfulness group reported significantly higher state mindfulness than both other groups but no there were no differences between groups cognitive reappraisal levels.  State mindfulness in the mindfulness group was significantly linked with increased prospective cognitive appraisal levels.  Higher state mindfulness was also found to be associated with greater increases in cognitive reappraisal during the week. |
| Gkika, 2014[51]  UK | Within-subjects crossover design  Aim/s: to compare effects of detached mindfulness and thought evaluation on factors related to  social anxiety maintenance | 12 female university students with high social anxiety  Mean age 19.2±1.7yrs | (i) 20min of detached mindfulness (DM) instruction and practice  (ii) 20min of thought evaluation (TE) instruction and practice  Participants delivered a 3min speech pre and post intervention as well as a filler task between conditions. | Fear of Negative  Evaluation scale, Self- Statements during Public Speaking scale, Social Avoidance and Distress Scale, Depression Anxiety Stress Scale, State-  Anticipatory Social Behaviors Questionnaire, observer perspective rating, state anxiety, belief in negative thoughts | DM had significantly greater reduction of anticipatory processing, observer perspective and negative belief compared with TE |
| Grant, 2013[52]  US | RCT  Aim/s: to examine the effects of a brief mindfulness intervention on cardiovascular reactivity and recovery to stressor tasks | 72 meditation naïve university students with a family history (first-degree relative) of hypertension  Range 18-25yrs  54% female | (i) 20min audio mindfulness breathing  (ii) 20min audio reading from Harry Potter and the Sorcerer’s Stone (control)  Following delivery of interventions, participants were exposed to 2 stressors: cold pressor task (CPT) and mirror-tracing task (MT). | HR and blood pressure during stressors | When exposed to the CPT, the mindfulness group had slower and reduced rates of systolic blood pressure recovery than the control group. Diastolic blood pressure recovery showed numerical pattern in this same direction but there were no significant group differences in reactivity when exposed to either stressor. |
| Green,  2017 [53]  US | RCT  Aim/s: to examine whether mindful breath attention can improve concentration and problems-solving | 257 meditation naïve university students  Mean age 19.3yrs±2.8yrs  49% female | (i) 15min mindfulness breathing audio  (ii) 15min progressive muscle relaxation (PMR) audio  (iii) 19min video of “Discovering Psychology” video series  Following the interventions participants were given anagram puzzle tasks to complete. | PANAS, Five Facet Mindfulness Questionnaire, Meditation Breath Attention Scores, Meditation-Related Experiences List, study specific questions in relation to expectation of intervention effectiveness before and after task. | Those in the mindfulness group had a significantly improved anagram task performance compared to those in the video group. |
| Hafenbrack, 2014[54]  USA | RCT  Aim/s: to investigate the effect of mindfulness meditation on the sunken-cost bias | Study 1:  57 university students  Mean age 19.4yrs±1.1yrs  68% female  Study 2:  109 university students  Mean age 20.2yrs±1.5yrs  66% female | (i) 15min audio of mindfulness induction and breathing meditation  (ii) 15min audio of mind wandering  Study task 1 and 2 had different decision tasks | Decision results from sunken-cost bias task (decision to buy bias had been resisted or not) | The mindfulness group significantly resisted the sunken-cost bias more than the control group, regardless of decision task. |
| Hamilton, 2013[55]  UK | RCT  Aim/s: to investigate if a brief mindfulness task can reduce food cravings | 98 university students  Mean age 20.0yrs  Range 18-45yrs  77% female | Following overnight abstinence from food and a food craving exercise:  (i) 10min audio of body scan  (ii) 10min audio of guided imagery  (iii) 10min audio of mind wandering instructions (control) | Craving intensity rating, Craving Experience Questionnaire, Eating Attitudes Test, Brief Mindfulness Measure, Emotional and Behavioral  Reactions to Intrusions Questionnaire | Craving intensity significantly increased in the control group relative to the other two groups (body scan and guided imagery). |
| Herwig, 2010[56]  Switzerland | RCT  Aim/s: to investigate the effect of mindfulness techniques on neural emotion processing | 30 adults  Age 23-41yrs  57% female | (i) “emotion-introspection” instruction and training to feel and be aware of current emotions and bodily feelings  (ii) “cognitive self-reflection” instruction and training to think and reflect on self and personal goals  (iii) Indifference instructions to be neutral | fMRI with 3.0 T GE Signa (tm) high definition Scanner | During the emotion-introspection condition there was a significant decrease in activation in the amygdala compared with the other two conditions. |
| Hofman, 2009[57]  USA | RCT  Aim/s: to compare reappraisal,  acceptance, and suppression strategies for regulating anxiety | 201 university students  Mean age 19.6yrs±2.9yrs  59% female | (i) Oral acceptance strategy instructions by experimenter  (ii) Oral reappraisal strategy instructions by experimenter  (iii) Oral reappraisal strategy instructions by experimenter  Strategies were used when asked to give an impromptu speech in front of a video camera. | HR recording, STAI, PANAS, Social Interaction Anxiety Scale, length of speech task, frequency of speech task premature termination | Both the acceptance and reappraisal groups had a significantly lower increase in HR than the suppression group.  The reappraisal group had significantly less subjective anxiety compared with the suppression group but the acceptance group was not significantly different compared with suppression or reappraisal. |
| Huffziger, 2009[58]  Germany | RCT  Aim/s: to investigate effects of rumination, distraction, and mindful self-focus on mood in depressed patients | 76 adults diagnosed with depression  Mean age 47.4 6yrs  ±11.7yrs  50% female | (i) 8min focusing on 28 cue cards with mindfulness instructions and prompts  (ii) 8min focusing on 28 cue cards with self-reflective, rumination instructions and prompts  (iii) 8min focusing on 28 cue cards with distraction, external-focused instructions and prompts  Interventions were delivered following a negative mood induction. | Structured Clinical Interview for DSM-IV (Diagnostic and Statistical Manual of Mental Disorders, 4th Edition), Montgomery Asberg Depression Rating Scale, German version of the Response Styles Questionnaire, Freiburg Mindfulness Inventory, PANAS | The mindfulness and distraction conditions significantly improved mood compared with the rumination condition. |
| Jenkins, 2014[59]  UK | RCT  Aim/s: to examine the effects of two mindfulness-based strategies on chocolate consumption | 135 adults  Mean age 20.5.yrs±2.4yrs  72% female | (i) acceptance instruction handout and 5min practice exercise  (ii) cognitive diffusion instruction handout and 5min practice exercise  (iii) relaxation instruction handout and 5min practice exercise  Participants carried a small bag of chocolates for 5 days as a part of experiment. | Number of chocolates eaten, timed handgrip task, Self-Report Habit Index, diary of chocolate consumption outside of supplied chocolate | The cognitive diffusion group ate significantly less chocolate compared with the acceptance and relaxation group. |
| Johnson, 2015[60]  USA | RCT  Aim/s: to examine the effects of one-session of mindfulness meditation (MM) versus sham meditation (SM) on cognitive tasks, state  mindfulness and mood | 92 meditation naïve university students  Mean age 23.4yrs±8.2yrs  Range 18-57yrs  65% female | (i) 25min audio mindfulness meditation (MM)  (ii) 25min audio sham meditation (SM)  (ii) 25min audio book reading of The Hobbit (control) | Repetitive Thoughts Questionnaire,  Toronto Mindfulness Scale, STAI-Form Y-state version, Profile of Mood States, Symbol Digit Modalities Test, computer-adaptive adjustable two-back task, forward/ backward Digit Span subtests of the Wechsler Adult Intelligence Scale-IV, Trail Making Test -parts A and B | Both MM and SM increased state mindfulness and reduced tension, confusion and total distress scores compared with the control group.  SM also significantly lowered  anger and fatigue scores compared with the control group. |
| Keng,  2018 [61]  Singapore | RCT  Aim/s: to examine the effects of brief mindfulness and loving-kindness meditation (LKM) on social rejection response with individuals with high/ borderline personality disorder (BPD) traits | 118 university students with high BPD traits  Mean age 21.7yrs±2.7yrs  64% female | (i) 10min audio mindfulness breathing meditation  (ii) 10min audio mindfulness LKM  (iii) 10min sit and rest  Following the interventions participants were administered a social rejection manipulation. | Five Facet Mindfulness Questionnaire, negative affect and feeling of rejection with a 5-item VAS, reaction time to competitive task measuring aggressive behaviour | The mindfulness group recovered significantly quicker in negative affect and feelings of rejection in comparison with the control group and also in negative affect in comparison with the LKM group. |
| Keng, 2016[62]  Singapore | RCT  Aim/s: to examine the effects of a brief mindful acceptance intervention on implicit and explicit dysfunctional attitudes | 79 adults with elevated depressive symptoms  Mean age 20.8±1.9yrs 73% female | (i) 15min mindfulness acceptance induction audio including 3min mindfulness breathing exercise  (ii) 15min thought wandering audio where participants instructed to let their minds wander  Interventions were delivered following a negative mood induction. | VAS sad mood rating, 39-item Five Facet Mindfulness Questionnaire, Dysfunctional Attitude Scale-Short Form 1, implicit association tests | Degree of concordance between implicit and explicit dysfunctional attitudes was significantly higher in the mindfulness group compared with the thought wandering group. |
| Kuehner, 2009[63]  Germany | RCT  Aim/s: to investigate the effects of  rumination, distraction and mindfulness on mood, dysfunctional attitudes and cortisol responses | 60 university students  Mean age 22.3±3.0yrs 50% female | (i) 8min focusing on 28 cue cards with mindfulness instructions and prompts  (ii) 8min focusing on 28 cue cards with self-reflective, rumination instructions and prompts  (iii) 8min focusing on 28 cue cards with distraction, external-focused instructions and prompts  Interventions were delivered following a negative mood induction. | Beck Depression Inventory, Dysfunctional Attitudes Scale, PANAS, saliva cortisol samples | The distraction group but not the mindfulness group, compared with the rumination group showed significantly decreased dysphoric mood. |
| Lai, 2014[64]  Canada | RCT  Aim/s: to compare the effects of mindfulness and prefrontal hemoencephalography neurofeedback (NFB) on enhancing attentional functioning | 70 meditation naïve university students Mean age 18.9±2.7yrs 66% female | (i) 15min of practicing mindfulness breathing meditation (MM) as per instructed by experimenter  (ii) NFB instructions to increase prefrontal blood flow with their eyes closed by relying on auditory feedback administered by BioTrace+ (v.2012)  (iii) 15min of counting backwards by ones from 500 (control) | Attention Network Test (ANT), Trail Making Test-Parts A and B, hemoencephalograph, Meditation Breath Attention Scores, Counting Backward Attention Scores, Profile of Mood States-Short Form, Toronto Mindfulness Scale | The NFB group improved ANT accuracy compared with the control group. |
| Lancaster, 2016[65]  USA | RCT  Aim/s: to test the effects of a brief mindfulness intervention compared with relaxation, with emphasis on gender differences | 123 university students  Mean age 19.0±1.3yrs  64% female | (i) 15min audio mindfulness breathing  (ii) 15min audio PMR breathing with no muscle tensing | PANAS, Toronto Mindfulness Scale, State-Trait Inventory of Cognitive and Somatic Anxiety | Both groups had significantly reduced negative and positive affect.  Both groups had a significant reduction in cognitive anxiety with gender having an effect in the PMR group where females reported significantly reduced somatic anxiety. |
| Laurent, 2015[66]  US | Quasi-RCT  Aim/s: to investigate the effects of a brief mindfulness intervention on conflict stress among couples and moderating effects of trait mindfulness | 101 university student heterosexual couples (for 2 months or more)  Mean age 21.3±6.1yrs | Before a conflict discussion, participants were instructed with both written material and an audio-guide to approach the conflict task in one of three ways, by:  (i) attending mindfully to whatever arose (mindfulness condition), (ii) taking the perspective of their partner (PT condition)  (iii) focusing on their own thoughts and feelings about the issue (control) | Five Facet Mindfulness Questionnaire. salivary cortisol, salivary alpha-amylase (sAA) | Within the mindfulness condition, high trait mindfulness couples had significantly better stress regulation results than those with low trait mindfulness and some gender differences for individual measures.  For males, the sAA response was slower in reaction and recover time than females and the reverse for the cortisol response. |
| Lebois, 2015[67]  USA | Repeated-measures design  Aim/s: to assess the effect of a mindfulness technique in relation to stressful events | 30 meditation naïve university students  Range 18-23yrs  50% female | (i) mindfulness attention strategy training (decentering) on a computer  (ii) immersion strategy training on a computer  Strategies were used in a task where stressful and non-stressful events were imagined. | fMRI with 3.0 T GE Signa (tm) high definition Scanner | The mindfulness group showed significantly greater activity in brain areas associated with perspective shifting and effortful attention.  The immersion group showed significantly greater brain activity in areas associated with self-processing and visceral states. |
| Lee, 2014[68]  USA | RCT  Aim/s: to examine  the impact of mindfulness on cognitive flexibility with individuals who have elevated general anxiety disorder (GAD)  symptoms | 53 adults with elevated GAD symptoms  Mean age 29.6±12.2yrs 79% female | (i) 15min of mindfulness breathing exercise led by instructor  (ii) 15min relaxation instructions while listening to music  (ii) 15min of thought wandering instruction while listening to music | Generalized Anxiety Disorder Questionnaire-IV, STAI, Penn State Worry Questionnaire, Wide Range Achievement Test-4eWord Reading subtest, Cognitive Flexibility Scale, Mindful Attention Awareness Scale, emotional Stroop and modified emotional Stroop switching task | Both the mindfulness and relaxation group had significantly better results on the emotional Stroop task compared with the wandering group. |
| Liu, 2012[69]  China | RCT  Aim/s: to explore the effects of a brief mindfulness intervention on pain tolerance and distress | 60 meditation naïve female university students  Mean age 20.5±1.5yrs | (i) 15min audio mindfulness breathing  (ii) 15min audio instructing use of distraction technique  (iii) 15min audio guide to spontaneous strategy, including instruction to rest and listen to light music  Participants were exposed to the cold pressor task pre and post interventions | Pain tolerance, pain rating, distress rating | The mindfulness group significantly improved the pain tolerance and reduced immersion distress compared with the spontaneous strategy group.  The distraction strategy also significantly improved pain tolerance. |
| Luberto,  2018[70]  US | RCT  Aim/s: to examine the effects of a single mindfulness session on emotional distress and state mindfulness in non-nicotine deprived smokers | 86 daily smokers  Mean age 46.0yrs±10.0yrs  45% female | (i) 10min audio sitting meditation  (ii) 10min audio reading of high school-level natural science textbook (control)  Prior to and after the interventions, participants completed computerized mirror-tracing persistence tasks. | Smoking history questionnaire, Fagerström test for nicotine dependence, Questionnaire of smoking urges-brief, Questionnaire of smoking urges-brief, Mirror-tracing persistence task-computerized, subjective units of distress, meditation experience questionnaire, State mindfulness scale | The mindfulness group experienced a significant increase in state mindfulness in comparison with the control group, |
| Lutz, 2014[71]  Switzerland | RCT  Aim/s: to examine the effects of brief mindfulness on neurobiological correlates of emotion regulation | 49 right-handed adults  Mean age 30.0±8.0yrs 65% female | (i) mindfulness instructions of present moment awareness strategy to apply to unpleasant or unknown stimuli  (ii) control group where instructions were to expect and perceive the  stimuli  Interventions were followed by exposure to picture slides from the International Affective Picture System. | fMRI with 3.0 T GE Signa (tm) high definition Scanner, Self-Rating Depression Scale, STAI, Eysenck Personality Inventory, Freiburg Mindfulness Inventory, Mindful  Attention and Awareness Scale | The mindfulness group had increased activation in brain regions associated with emotion regulation, along with reduced activation in brain regions involved in the processing of emotional valence and arousal, compared with the control group. |
| Marek, 2013[72]  USA | Randomized within subjects  Aim/s: to investigate the effects of mindfulness versus distraction on anxiety during food exposure | 17 women with eating disorders (ED) and 23 healthy women  Mean age 29.1±12.0yrs | (i) 15min audio of mindful eating exercise  (ii) 15min distraction intervention consisting of five word searches  Interventions were followed by a food exposure task. | VAS ratings of current emotional state over three scales: negative affect, positive affect, and satiety | Significant interaction between treatment condition  and group:  The ED group had a significant increase in negative affect after the mindfulness intervention compared with the distraction intervention.  The non-clinical group had a significant decrease in negative affect after the mindfulness intervention compared with the distraction intervention.  Both groups had a significant increase in satiety after the mindfulness condition versus the distraction condition |
| May, 2010[73]  UK | RCT  Aim/s: to investigate the impact of attention strategies on frequency of food thoughts | Experiment 1:  48 university students who were attempting to cut down on food snacks  Mean age 21.8yrs  81% female  Experiment 2:  49 university students  Mean age 29.9yrs  63% female | Experiment 1:  (i) 15min mindfulness breath focus audio  (ii) 15min imagery diversion audio with instructions to think about going through a chosen activity  (iii) 15min thought suppression audio  (iV) 15min instructions to think about anything at all including snack foods (control)  Experiment 2:  (i) 10min mindfulness body scan audio  (ii) 10min guided imagery audio exercise  (iii) 10min control audio with instructions to let thoughts wander  Participants asked to abstain from eating for 2hrs before coming to lab. | White Bear Suppression Inventory, Mindful Attention Awareness Scale, Eating Attitudes Test, VAS food craving rating, percentage of food-related thoughts | Experiment 1:  The imagery diversion group had significantly reduced intrusive food thoughts.  The thought suppression group significantly reduced intrusive food thoughts and food cravings.  Experiment 2:  The mindfulness group had a significant reduction in food-related thoughts |
| McClintock, 2013[74]  US | RCT  Aim/s: to examine the efficacy of a brief mindfulness intervention for alleviating the affective consequences of interpersonal dependency | 70 university students classified as having high trait interpersonal dependency  Mean age 19.1±1.2yrs  90% female | (i) 20min audio mindfulness breathing  (ii) 20min audio distraction protocol (control)    Interventions were delivered after undergoing a mood induction to exacerbate the core cognitive and affective features of interpersonal dependency. | STAI, Negative Affect Subscale of PANAS, Toronto Mindfulness Scale, Interpersonal Dependency  Inventory | The mindfulness intervention was a significant predictor of reductions in state anxiety and state negative affect and greater levels of state mindfulness compared with the distraction intervention. |
| McHugh, 2013[75]  UK | RCT  Aim/s: to investigate the impact of brief mindfulness on patients with traumatic brain injury (TBI) in an over-selectivity task | 24 referrals from a head injury clinic with a TBI  Mean age 29.5±8.3yrs  16% female | (i) 10min audio with mindfulness breathing instructions  (ii) no instructions group (control)  Interventions were followed by memory loading and over-selectivity tasks. | Mindful Attention Awareness Scale, Trails A and B, The Wechsler Test of Adult Intelligence, memory load task, over-selectivity task (automated). | The mindfulness group had a significant reduction in stimulus over-selectivity (less incorrect selections) when compared to the control group. |
| Metcalfe,  2017[76]  Canada | RCT  Aim/s: to examine whether individuals with borderline personality disorder (BPD) lack skills in emotion regulation strengthening when exposed to strategies including mindfulness awareness | 55 participants with BPD or healthy matches  Mean age 31.4yrs±9.3yrs  61% female | (i) mindfulness awareness instructions to “notice” (e.g., to attend present emotional experience without judgement)  (ii) instructions to “react” (control group when instructed to react as normal)  (iii) instructions to “distract” (e.g., to attempt to think of something neutral to negate an emotional response)  Interventions were applied while being exposed to picture slides from the International Affective Picture System that were BPD-relevant. | Emotional intensity on 9-point Likert scale, heart rate with electrocardiography (ECG), skin conductance level | When using the distract strategy instructions, participants did not report an increase in negative emotion when exposed to the negative stimulus. |
| Molet, 2013[77]  France | Mixed factorial design  Aim/s: to investigate whether a focused attention or unfocused attention intervention reduces distress from an ostracism experience | 48 university students  Mean age 23.3±7.0yrs  67% female | (i) 12min focused breathing attention (FA) audio  (ii) 12 min unfocused attention (UA) audio (instructed to think about whatever came to mind)  Prior to the interventions, participants were randomized to an experimentally induced ostracism or inclusion experience. | Ostracism questionnaire with ratings for during the experimental task (‘immediate’) and several minutes after the task (‘delayed’) | Among those undergoing the ostracism experience, the FA group showed a significantly greater increase in need satisfaction from the immediate to the delayed rating than for participants in the UA group. |
| Nasser, 2017[78]  USA | RCT  Aim/s: to compare the effects of two types of awareness training paradigms | 97 university students classified as high worriers  Mean age 19.1±1.2yrs  77% female | (i) 20min audio mindfulness breathing meditation (MM) and instructions  (ii) 20min audio present moment joy (PMJ) mediation and instructions | Penn State Worry Questionnaire, Beck Depression Inventory, Philadelphia Mindfulness Scale, Emotion Regulation Questionnaire, Toronto Mindfulness Scale - Decentering and Curiosity Subscale, STAI, PANAS | MM significantly increased decentering scores more than PMJ.  The two groups both had significantly decreased anxiety and negative affect.  Only PMJ significantly increased positive affect. |
| Papies, 2012[79]  Netherlands | RCT  Aim/s: to assess the effect of a brief mindfulness technique on diminishing impulsive responses | Study 1:  40 university students  Study 2a/b:  55 university students  Study 3:  50 university students | Study 1:  (i) mindfulness attention strategy training on a computer  (ii) immersion strategy training on a computer (control)  Study 2a/b:  (i) mindfulness attention strategy training on a computer  (ii) no strategy training on a computer (control), just observing  Study 3:  (i) mindfulness attention strategy training on a computer  (ii) immersion strategy training on a computer (control)  Interventions were followed by exposure to pictures of food and pictures from the International Affective Picture System. | Study 1:  Approach-avoidance task  Study 2a/b:  Approach-avoidance task  Study 3:  Approach-avoidance task. | The mindfulness group did not have an approach bias towards attractive food in contrast to control group across all three studies regardless of stimuli. |
| Papies, 2015[80]  Netherlands | RCT  Aim/s: to examine how mindfulness effects motivation and appetitive behavior | Experiment 1:  78 university students  Mean age 20.9±4.1yrs  69% female  Experiment 2:  75 university students  Experiment 3:  114 university students | All the training was presented on a computer:  Experiment 1:  (i) 12min of mindfulness attention training  (ii) 12min control training where participants were instructed to immerse themselves in their experience  Experiment 2:  (i) 12min of mindfulness attention training  (ii) 12 control training  where participants were instructed to observe and relax  Experiment 3:  (i) 10min of mindfulness attention training  (ii) 10 relaxed training  where participants were instructed to observe and relax  (iii) no training (control) | Experiment 1:  Sociosexual Orientation Inventory, attractiveness ratings, potential partner judgements  Experiment 2:  Food Cravings Questionnaire-State, food choice task, hunger ratings  Experiment 3:  Number of calories in lunch, food choices, hunger ratings | Experiment 1:  In the mindfulness group motivation for casual sex was not a significant predictor of perceived attractiveness of stimuli compared with the control group where it was a significant predictor.  Experiment 2:  Hunger significantly predicted choice of unhealthy foods in the control group but not the mindfulness group.  Healthy food choice was significantly increased in the mindfulness group compared with the control group.  Experiment 3:  The mindful group took fewer  calories overall, were less likely to choose unhealthy snacks and the effect of hunger on number of calories consumed and unhealthy food choice was significantly decreased compared with the control group. |
| Park, 2014[81]  USA | Randomized crossover design  Aim/s: to investigate whether mindfulness meditation (MM) lowers blood pressure (BP) and whether changes are mediated by a reduction in sympathetic nerve activity | 15 hypertensive African-American males with chronic kidney disease  Mean age 55.7±1.4yrs | (i) 14min audio of mindfulness breathing, mini body scan and brief self-compassion meditation (MM)  (ii) 14min audio of BP education (control) (iii) 10min of guided controlled breathing (CB) | BP, muscle sympathetic nerve activity (MSNA), HR and respiratory rate | The MM group had significantly lower BP, HR and MSNA compared with the control group and the CB group. |
| Paz,  2017[82]  Israel | RCT  Aim/s: to test whether brief mindfulness effects distress intolerance within a smoking population | 104 smokers (>10 cigarettes per day)  Mean age 26.0±5.4yrs  45% female | (i) 7 min audio of present moment attention and awareness (PMAA) training  (ii) 7 min audio educational track about jazz music  Interventions were followed with a stressor task (i.e., 2.5 min anxiogenic stressor consisting of paced voluntary over-breathing) where the mindfulness group were told to use their PMAA training to cope and the other group was told to cope-as-usual (control) | The Mini International Neuropsychiatric Interview, Distress Tolerance Scale, State Mindfulness Scale, Minnesota Nicotine Withdrawal Scale, Subjective Units of  Distress Scale, respiratory sinus arrhythmia, skin conductance levels | Compared with the control group, the PMAA group had reduced psych-physiological dysregulation in response to the stressor. |
| Pepping, 2015[83]  Australia | RCT  Aim/s: to investigate if there is a causal relationship between state attachment and state mindfulness | 86 meditation naïve university students  Mean age 20.4±4.9yrs  78% female | (i) 15min mindfulness induction (either mindfulness of the breath, thoughts, emotions, or the body) read aloud  (ii) 15min induction where either a story about nature was read aloud or where participants asked to reflect for 15min on personal use of listening skills, assertion, or the use of questions in conversation (control) | Five-item Mindful Attention and Awareness Scale-State version, 21-item State Adult Attachment Measure | State mindfulness increased significantly in the mindfulness group compared with the control group. |
| Reynolds, 2015[84]  New Zealand | RCT  Aim/s: to evaluate whether mindfulness effects social avoidance and decision making in a laboratory experiment | 101 adults  Mean age 21.0±2.9yrs  Range 18-30yrs  64% female | (i) 10min mindfulness induction and breathing exercise audio  (ii) 10min audio of public service recording from a national radio program  Interventions were followed by a disgust induction for half of the participants. | Toronto Mindfulness Scale, Differential Emotions Scale, immediate behavioral avoidance (seat or fresh water task), anticipated social avoidance (assessed with three decision-making scenarios), perceptions of social networks (mapping activity) | Results from the mindfulness group were found to be significant in predicting fewer names listed for inner social network circles. |
| Rogojanski,  2010[85]  Canada | RCT  Aim/s: to investigate the effectiveness of a brief mindfulness intervention versus a suppression strategy for coping with cigarette cravings | 61 smokers (≥10cigarettes/  day over the last month)  Mean age 40.3±12.4yrs  41% female | 20-min smoking cue exposure was undertaken while simultaneously receiving:  (i) mindfulness instructions to accept thoughts and feelings that arise in a mindful way  (ii) suppression instructions to distance self from the experience by actively avoiding the thoughts and feelings that arise | Cognitive Affective Mindfulness Scale-Revised, Depression Anxiety Stress Scales-21-item, Fagerström Test of Nicotine Dependence, PANAS, Relapse Situation Efficacy Questionnaire, VAS for current moment craving, expired breath carbon monoxide level, cigarette use amount | There was a significant increase in self-efficacy in coping with smoking urges for both conditions.  Within the mindfulness condition, negative affect, depression, and nicotine dependence scores were significantly decreased but not within the suppression condition. |
| Scherpiet, 2015[86]  Switzerland | RCT  Aim/s: to investigate the effect of mindfulness techniques on neural emotion processing in female borderline personality disorder (BDP) patients and healthy adults | 19 BPD females and 19 healthy females  Mean age 30.2±5.4yrs | (i) instruction and training to feel and be aware of current emotions and bodily feelings during the “emotion-introspection” task  (ii) instruction and training to think and reflect on self and personal goals during the “self-reflection” task  (iii) instruction to be neutral during the “neutral” task (control) | fMRI with 3.0 T GE Signa (tm) high definition Scanner | Activations patterns were significantly different between the BDP group and the healthy group during the self-reflection condition and the mindfulness condition.  Mindful introspection compared with the neutral condition was associated with higher activations in bilateral motor/pre-motor regions, left inferior frontal gyrus, and left posterior cingulate cortex, |
| Schofield, 2015[87]  Australia | RCT  Aim/s: to examine if mindfulness has an impact on inattentional blindness (IB) | 794 university students  Mean age 19.6±3.2yrs  64% female | (i) 7min audio-guided mindfulness exercise using raisins  (ii) 7min informative audio, factual description about raisins (control) | Computer task testing IB, computer task testing distractor processing | The mindfulness group had significantly reduced rates of IB compared with the control group. |
| Sharpe, 2013[88]  Australia | RCT  Aim/s: to investigate the efficacy of mindfulness on an experimental pain task | 140 university students  Mean age 20.1±3.2yrs  42% female | Prior to undergoing a training condition, participants were randomized to receive reassuring or threatening information about the cold pressor task that was used.  (i) 12min audio of mindfulness body scan (ii) 12min audio of progressive muscle relaxation (PMR) | Depression Anxiety Stress Scales, Fear of Pain Questionnaire, Toronto Mindfulness Scale, pain threshold and tolerance in time (seconds), VAS pain rating | Although there was no effect of condition on pain rating, tolerance or threshold, those in the PMR condition with threatening information were more likely to attend to pain-related stimuli on the dot-probe task. |
| Singer, 2007[89]  Canada | RCT  Aim/s: to examine the role of metacognitive processing in the prevention of relapse to depression | 80 remitted depression patients  Mean age 39.2±12.5yrs  76% female | (i) 10min verbal instruction on acceptance as a technique for dealing with sad moods  (ii) 10min verbal instruction on rumination as a technique for dealing with sad moods  (iii) 10min verbal instruction on distraction as a technique for dealing with sad moods  (iv) no training (control)  Following the interventions was a negative mood induction. | Structured Clinical Interview for Diagnosis, Beck Depression Inventory, Beck Anxiety Inventory, VAS for negative mood, Attitude towards Negative Experience Scale, Positive Beliefs about Depressive Rumination Scale | Both the distraction and  acceptance groups had significantly reduced the intensity of negative mood compared with rumination and control conditions.  Negative attitudes towards negative experience were significantly reduced in the acceptance group only. |
| Steffen, 2014[90]  USA | RCT  Aim/s: to investigate the impact of a brief mindfulness meditation on cardiovascular reactivity and recovery during a laboratory stressor | 62 meditation naïve university students  Mean age 19.9±2.2yrs  50% female | (i) 15min audio mindfulness breathing (ii) 15min audio from same source focusing on awareness of the environment and the importance of ethical behaviors  Following delivery of interventions, a standardized experimental stressor was given to participants. | Beck Depression Inventory, STAI, HR, diabolic (DBP) and systolic (SBP) blood pressure, PASAT (Paced Auditory Serial Addition Test) performance scores | At the end of the intervention but before the stressor, the mindfulness group had significantly reduced SBP compared with the control group but there was no difference with DBP.  After the PASAT stressor, SBP and DBP were lower in the mindfulness group compared with the control. |
| Swain, 2014[91]  New Zealand | RCT  Aim/s: to compare effectiveness of a DVD (digital versatile disc) versus face-to-face therapist, in a laboratory-based acute pain experiment, using either hypnosis or mindfulness | 240 adults  Mean age 21.0yrs±2.9  Range 18-38yrs  50% female | (i) 3min hypnosis face-to-face  (ii) 3min hypnosis on DVD  (iii) 3min mindfulness face-to-face  (iv) 3min mindfulness on DVD  (v) 2min of television watching  Cold pressor task was used to induce experimental pain. | Cold pressor task tolerance time,  pain experience post task pain VAS, pain reduction VAS, ratings of: anxiety reduction, readiness to repeat, perceived helpfulness, enjoyment of intervention | Brief hypnosis and mindfulness were significantly both more effective for acute pain than the control but subjective pain experience was reduced more with hypnosis than mindfulness. |
| Szasz, 2011[92]  Romania | RCT  Aim/s: to examine the effects of different emotion regulation strategies on experimentally induced anger | 97 university students  Mean age 22.3±4.3yrs  62% female | (i) written instructions for acceptance as a strategy for dealing with anger  (ii) written instructions for reappraisal as a strategy for dealing with anger  (iii) written instructions for suppression as a strategy for dealing with anger  Interventions took approximately 4min to read and were followed by an anger induction procedure. | Profile of affective distress, Affective style questionnaire, Attitudes and beliefs scale II, computerized mirror-tracing persistence task | The group using the reappraisal strategy was significantly more effective at reducing anger than either of the other groups.  Groups using either reappraisal or acceptance strategy also persisted significantly longer in the persistence task than the control group (anger was negatively associated with task persistence). |
| Szasz, 2012  [93]  Romania | RCT  Aim/s: to investigate the effects of different emotion regulation strategies on smoking-related behavior | 94 smokers (≥10cigarettes/  day for >1yr) who want to quit Mean age 23.0±5.7yrs  88% female | Written instructions to spend two minutes using and practicing:  (i) acceptance and urge surfing as a strategy for smoking cravings  (ii) reappraisal as a strategy for smoking cravings  (ii) suppression as a strategy for smoking cravings  Following the interventions, a craving induction procedure was undertaken by participants. | Fagerström Test of Nicotine Dependence, Questionnaire on Smoking Urges-Brief, PANAS, Affective Style Questionnaire, Paced auditory serial addition task, Modified dot-probe task | Those who used the reappraisal strategy reported significantly less negative affect, had significantly reduced attentional biases for smoking-related cues, and persisted significantly longer with a distressing task than those who used the acceptance or suppression strategies. |
| Szasz, 2016[94]  Romania | RCT  Aim/s: to investigate the effects of different emotion regulation strategies on anger and sadness when decision-making | 165 university students  Mean age 24.2±7.0yrs  89% female | Written instructions for:  (i) acceptance as a strategy for dealing with anger or sadness  (ii) reappraisal as a strategy for dealing with anger or sadness  (iii) rumination as a strategy for dealing with anger or sadness  Plus:  (iv) no instructions for a strategy (control)  Interventions were followed by a sadness or anger induction. | PANAS, Affective Style Questionnaire, Rumination Response Scale, Anger Rumination Scale, Balloon Analogue Risk, Iowa Gambling Task | The reappraisal group was significantly more effective in decreasing anger and negative affect compared with the other groups and had significantly less sadness than the rumination or control group.  The acceptance group had significantly less sadness than the control and rumination groups.  The reappraisal group had significantly more adaptive  decision-making strategies, with the least risk aversion as compared with the other groups. |
| Tincher, 2015[95]  USA | RCT  Aim/s: to examine the effect of a mindfulness intervention on linguistic intergroup bias (LIB) | 84 university students  Mean age 19.0yrs  71% female | (i) written instructions for mindfulness attention strategy  (ii) written instructions for immersion strategy | Multiple-choice task rating experimental stimuli transcribed into numbers based on the Linguistic Category Model | The mindfulness attention group demonstrated a significantly reduced LIB compared with the immersion group. |
| Troy,  2018[96]  US | RCT  Aim/s: to examine the effects of reappraisal and acceptance strategies on affect outcomes and physiological responses | 77 university students and 65 non-university students from same community  Mean age 22.5yrs±5.3yrs  72% female | (i) mindfulness acceptance instructions for emotion regulation read aloud and presented visually on a computer  (ii) reappraisal instructions for emotion regulation read aloud and presented visually on a computer  Following the intervention instructions participants were exposed to sad film clips and asked to use intervention strategies. | Self-reported experience of emotion, skin conductance levels (SCL), Likert scale of perceived cognitive costs | Reappraisal strategies significantly improved affect in comparison to acceptance strategies.  Acceptance were perceived as significantly less difficult to use (i.e., lower cognitive cost) than reappraisal and had a significantly lower physiological response (i.e., lower SCL response). |
| Ussher, 2009[97]  UK | RCT  Aim/s: to investigate the acute effects of a brief mindfulness  Intervention and isometric exercise on smoking desire and withdrawal symptoms | 48 smokers (≥10cigarettes/  day for >3yrs)  Mean age 27.8±8.4yrs  35% female | (i) 10min audio mindfulness body scan (BS)  (ii) 10min audio isometric exercises (IE)  (iii) 10min audio natural history reading (control) | Fagerström Test for Nicotine Dependence, Mindful Attention Awareness Scale, Mood and Physical Symptoms Scale | Both BS and IE were effective for reduction of smoking desire and withdrawal symptoms both in the laboratory and in the participant’s own environment compared with the control. |
| Ussher, 2012[98]  UK | RCT  Aim/s: to examine the immediate effects of a brief mindfulness intervention among chronic pain patients | 55 chronic pain outpatients  Mean age 60.6±16.6yrs  78% female | (i) 10min audio of mindfulness body scan  (ii) 10 audio of natural history reading (control) | Philadelphia Mindfulness Scale, Hospital Anxiety and  Depression Scale, Brief Pain Inventory, pre-post ratings of pain severity, pain-related distress, perceived ability to perform daily activities, perceived social functioning and measures of pain acceptance, present focus and decentering | Immediately after listening to the audio in clinic, the body scan group had significantly reduced pain-related distress and pain interference with social relations compared with the control group. |
| Villa, 2014[99]  USA | RCT  Aim/s: to compare brief mindfulness versus somatic relaxation on state rumination and induced negative affect in a laboratory environment | 114 university students  Mean age 20.3yrs  61% female | (i) 8min audio mindfulness breathing  (ii) 8min audio somatic relaxation based on progressive muscle relaxation  (iii) 8min no-treatment group (control)  Prior to intervention delivery, participants were exposed to a negative mood and rumination induction. | Beck Depression Inventory, Beck Anxiety Inventory, Response Styles Questionnaire, Acceptance and Action Questionnaire, PANAS–Short Form, State Rumination | Mindfulness decreased state rumination more significantly than the control for women.  Relaxation decreased state rumination more significantly than the control for men.  State rumination reduction, mediated decreased negative affect for women but not for men. |
| Wade, 2009[100]  Australia | RCT  Aim/s: to examine the effectiveness of three different approaches to body dissatisfaction | 100 female university students  Mean age 24.4±9.4yrs | (i) written instructions for acceptance technique and 5min practice  (ii) written instructions for cognitive dissonance technique and 5min practice  (iii) written instructions for distraction technique and 5min practice  (iv) written instructions for rumination technique and 5min practice (active control)  (v) control group with no training instructions  Prior to interventions, a body dissatisfaction induction procedure was implemented for all participants. | Body Dissatisfaction scale from the Eating Disorder Inventory, VAS for weight satisfaction, appearance satisfaction and distress concerning feelings about body | Acceptance, cognitive dissonance, and distraction groups significantly increased weight satisfaction compared with the rumination and control group.  The acceptance group significantly improved appearance satisfaction compared with the ruminative group. |
| Wenk-Sormaz, 2005[101]  USA | RCT  Aim/s: to test whether a mindfulness-based meditation leads to a  reduction in habitual responding | Study 1:  120  university students  Mean age 19.5±1.9yrs  63% female  Study 2:  90 university students  63% female | Study 1:  (i) 20min audio guide of breathing meditation  (ii) 20min of learning strategy induction (e.g. learning method of loci)  (iii) instructions to rest, sit and let mind wander (control)  Study 2:  (i) 20min audio guide of breathing meditation  (ii) 20min of general knowledge testing  (iii) instructions to rest, sit and let mind wander (control) | Study 1:  Stroop test, word production task, galvanic skin response  Study 2:  Stroop test, word production task, galvanic skin response, Tellegen's Absorption Scale | Study 1:  The meditation group had significantly better Stroop scores (representing improved habitual responding) compared with the other groups.  The meditation group had significantly reduced arousal (skin conductance results) compared with the other groups.  Study 2:  The meditation group showed a significant reduction in habitual responding on the category task, compared with the other groups. |
| Westbrook, 2011[102]  USA | RCT  Aim/s: to examine whether mindful attention can improve smoking-related behaviors | 54 meditation naïve smokers (≥10cigarettes/  day) who want to quit  Mean age 45.0±11.4yrs  31% female | (i) verbal instructions for mindfulness attending  (ii) verbal instructions to look and view things as naturally as possible | Beck Depression Inventory II, fMRI with 3.0 T GE Signa (tm) high definition Scanner, ratings of smoking and neutral images, rating of craving and negative affect | The mindfulness group had significantly lower self-reported cravings to smoking images and reduced neural activity in a craving-related region of the brain. |
| Wilson, 2014[103]  UK | Quasi-RCT  Aim/s: to examine the differences between emotional regulation strategies on self-reported anxiety and physiological arousal | 80 university students  Mean age 27.1±6.4yrs  60% female | Interventions were a short written paragraph based on the adaptation of the Swamp Metaphor by Hayes et al., (1999) which took under 5min to read and were adjusted as per below:  (i) mindfulness strategy instructions added (ii) acceptance strategy instructions added (iii) suppression strategy instructions added (iv) endurance strategy instructions added  (v) time matched written content about nature (control)  Participants were given a short verbal analogies stressor task pre and post interventions. | Anxiety (15-item self-report scale of eight relaxation-related and seven anxiety-related adjectives), skin conductance level with finger electrodes | The only significant difference between groups was between the acceptance and control group with the acceptance group being less physiologically aroused. |
| Wolfgast, 2011[104]  Sweden | RCT  Aim/s: to compare the effects of cognitive reappraisal and acceptance as emotion regulation strategies | 94 university students  Mean age 27.4±8.2yrs  51% female | (i) written instructions for acceptance as a strategy  (ii) written instructions for reappraisal as a strategy  (iii) no strategy (control) | PANAS, Emotion Regulation Questionnaire, Acceptance and Action Questionnaire, avoidance tendency rating, skin conductance level and facial electromyography | The reappraisal and acceptance groups had a significantly higher reduction of subjective distress, physiological reactions associated with aversive emotions and behavioral avoidance compared with the control.  The reappraisal group had a positive correlation between elicited aversive emotion and avoidance. |
| Zeidan, 2010[105]  USA | RCT and mixed factorial design  Aim/s: to investigate the effects of brief mindfulness training on experimental pain | Experiment 1:  22 meditation naïve university students  Median age 19yrs  Range 18-36yrs  32% female  Experiment 3:  21 meditation naïve university students  Median age 21yrs  Range 18-26yrs  62% female | Experiment 1:  (i) 20min mindfulness meditation training and practice in small groups  (ii) 13min relaxation task (i.e. reading a magazine)  Experiment 3:  (i) 20min mindfulness meditation training and practice in small groups  (ii) 13min math distraction task  (iii) 13min relaxation task (relax by deep breathing)  Thermal stimuli was phasic pain delivered used a transcutaneous alternating current sine wave delivered by a portable device. | State Anxiety Inventory, Freiburg Mindfulness Inventory, numerical rating scale for pain | Experiment 1: Pain ratings and pain thresholds significantly decreased from baseline with the meditation training along with significant increases in mindfulness and decreases in anxiety compared with relaxation.  Experiment 3:  Both math distraction and mindfulness were effective at reducing high pain ratings compared with relaxation.  Mindfulness significantly reduced low pain rating compared to math distraction and relaxation.  Mindfulness also significantly reduced pain sensitivity and state anxiety and increased levels of mindfulness compared with math distraction and relaxation. |
| Zeidan, 2010[106]  USA | RCT  Aim/s: to examine effects of brief mindfulness versus sham on cardiovascular variables | 82 meditation naïve university students  Mean 19yrs ±6.4yrs  55% female | (i) 20min mindfulness meditation in small groups  (i) 20min sham meditation in small groups (i.e. asked to take deep breathes and told were meditating)  (iii) 20min control were sat in small groups and told could speak to each other or sit quietly but no other activities | Profile of Mood States, STAI, HR and BP | Mindfulness significantly reduced distressed mood, HR and depression and fatigue ratings compared with the sham and control interventions.  Both sham meditation and mindfulness reduced tension ratings compared with the control although the mindfulness had a larger reduction. |
| Zeidan, 2010[107]  USA | RCT  Aim/s: to examine the effects of brief meditation on cognition and mood when compared to an active control group | 63 meditation naïve university students  Mean age 22.5yrs±8.1yrs  60% female | (i) 20min mindfulness meditation  (ii) 20min audio book reading of “The Hobbit” (control) | Freiburg Mindfulness Inventory, State Anxiety Inventory, Self-report depression scale, Profile of Mood States, Controlled Oral Word Association Test, Symbol Digit Modalities Test, forward/backward digit span, Wechsler Adult Intelligence Scale-Revised, computer adaptive n-back task | Both interventions improved mood but compared with the control, only mindfulness reduced fatigue, anxiety and improved, visual-spatial processing, working memory, executive functioning and mindfulness |
| Zeidan, 2015[108]  USA | RCT  Aim/s: to determine whether the analgesic mechanisms of mindfulness meditation are different from placebo | 75 adults  Mean age 27.0±6.0yrs  49% female | (i) 20min mindfulness meditation  (ii) 20min sham meditation  (iii) 20min placebo conditioning (instead of training, placebo cream was applied to “reduce” discomfort)  (iv) 20min audio book (control)  Thermal stimuli was phasic pain delivered used a transcutaneous alternating current sine wave delivered by a portable device. | Pain intensity and VAS unpleasantness rating, Freiburg Mindfulness Inventory short form, perceived effectiveness ratings, neural activity using fMRI | All interventions were significantly superior in reducing pain intensity and unpleasantness compared with the control  Mindfulness significantly reduced pain intensity and unpleasantness ratings more than placebo or sham meditation |

aUK (United Kingdom), USA (United States of America), bRCT (randomized controlled trial), cSTAI (State-Trait Anxiety inventory), HR (heart rate), VAS (visual analogue scale), PANAS (Positive and Negative Affect Schedule), EEG (electroencephalogram), ADHD (Attention deficit hyperactivity disorder), BMI (body mass index), fMRI (functional magnetic resonance imaging)
